# Supplementary material
Source: PubMed Central journal article supplement (PMC11067669)
Supplement: media-1.pdf [file media-1.pdf]

Neutrophil extracellular trap formation linked to idiopathic pulmonary fibrosis severity and survival

**Supplemental Table 1.**

| Supplement table. Differentially expressed proteins in IPF lung tissues |          |          |          |
|-------------------------------------------------------------------------|----------|----------|----------|
|                                                                         | FC       | log2(FC) | raw.pval |
| PLIN3                                                                   | 113.8    | 6.8303   | 1.34E-05 |
| HCFC1                                                                   | 0.021301 | -5.553   | 3.86E-05 |
| SRSF11                                                                  | 10.934   | 3.4507   | 0.000558 |
| GOT2                                                                    | 69.792   | 6.125    | 0.000924 |
| PIP4K2A                                                                 | 28.799   | 4.848    | 0.001396 |
| PDIA6                                                                   | 11.933   | 3.5769   | 0.001752 |
| SERPINH1                                                                | 8.6939   | 3.12     | 0.001753 |
| ERC1                                                                    | 60.984   | 5.9304   | 0.002596 |
| TBCA                                                                    | 8.4263   | 3.0749   | 0.00287  |
| ARPC4                                                                   | 18.199   | 4.1858   | 0.003097 |
| CSRP2                                                                   | 0.044171 | -4.5008  | 0.003371 |
| PABPC1                                                                  | 17.825   | 4.1558   | 0.003699 |
| ACADVL                                                                  | 0.076888 | -3.7011  | 0.003862 |
| PRDX3                                                                   | 3.4105   | 1.77     | 0.003918 |
| NUMA1                                                                   | 0.17715  | -2.497   | 0.004251 |
| CTTN                                                                    | 0.073382 | -3.7684  | 0.004434 |
| BZW1                                                                    | 7.0332   | 2.8142   | 0.00477  |
| PDLIM2                                                                  | 0.03152  | -4.9876  | 0.005138 |
| NID2                                                                    | 0.018354 | -5.7678  | 0.005351 |
| PGM1                                                                    | 27.64    | 4.7887   | 0.006797 |
| CAVIN2                                                                  | 0.30732  | -1.7022  | 0.008871 |
| RPL38                                                                   | 5.7121   | 2.514    | 0.00984  |
| NELFB                                                                   | 62.909   | 5.9752   | 0.010233 |
| PPIB                                                                    | 7.6251   | 2.9308   | 0.010747 |
| S100A8                                                                  | 5.9271   | 2.5673   | 0.011707 |
| CEP170                                                                  | 11.46    | 3.5185   | 0.011912 |
| ADIRF                                                                   | 0.089893 | -3.4756  | 0.012662 |
| HECTD1                                                                  | 6.5128   | 2.7033   | 0.014883 |
| DCPS                                                                    | 13.537   | 3.7588   | 0.015703 |
| HINT2                                                                   | 0.16119  | -2.6331  | 0.016519 |
| SRP14                                                                   | 0.18806  | -2.4107  | 0.021065 |
| CLIC5                                                                   | 0.044844 | -4.4789  | 0.021484 |

|         |          |          |          |
|---------|----------|----------|----------|
| SPTAN1  | 0.42669  | -1.2287  | 0.022095 |
| EVPL    | 0.23867  | -2.0669  | 0.022314 |
| HNMT    | 0.18029  | -2.4716  | 0.022659 |
| PDXK    | 8.1612   | 3.0288   | 0.023942 |
| SAA1    | 10.613   | 3.4078   | 0.025799 |
| SMTN    | 0.10217  | -3.291   | 0.026498 |
| PLIN4   | 0.074885 | -3.7392  | 0.02654  |
| CGN     | 0.052645 | -4.2476  | 0.02661  |
| HLA-B   | 7.8322   | 2.9694   | 0.02871  |
| ITGB4   | 10.055   | 3.3298   | 0.030233 |
| HNRNPA3 | 0.39674  | -1.3337  | 0.031724 |
| LASP1   | 0.28473  | -1.8123  | 0.031765 |
| KIF5B   | 0.29463  | -1.763   | 0.032184 |
| CTSB    | 5.132    | 2.3595   | 0.032557 |
| HNRNPM  | 4.6959   | 2.2314   | 0.033903 |
| RPS3A   | 0.31807  | -1.6526  | 0.035262 |
| PURB    | 0.15649  | -2.6758  | 0.035939 |
| EHD2    | 0.21471  | -2.2196  | 0.037727 |
| NME1    | 4.1509   | 2.0534   | 0.037753 |
| CLIP1   | 3.0146   | 1.592    | 0.037842 |
| MVP     | 3.6004   | 1.8482   | 0.03794  |
| PSMA2   | 52.036   | 5.7014   | 0.039768 |
| CYCS    | 11.512   | 3.5251   | 0.040542 |
| C4A     | 2.2781   | 1.1878   | 0.040588 |
| C3(1)   | 0.31969  | -1.6453  | 0.041409 |
| NPM1    | 4.2676   | 2.0934   | 0.041662 |
| GPD2    | 0.34412  | -1.539   | 0.041776 |
| TALDO1  | 2.4325   | 1.2824   | 0.042361 |
| DDRKG1  | 3.4888   | 1.8027   | 0.042875 |
| EFEMP1  | 0.23736  | -2.0749  | 0.044248 |
| ENAH    | 0.22794  | -2.1333  | 0.044267 |
| CUL3    | 0.2669   | -1.9057  | 0.044506 |
| SEPTIN9 | 0.22738  | -2.1368  | 0.045621 |
| CA1     | 2.1825   | 1.126    | 0.046374 |
| CALD1   | 0.33731  | -1.5679  | 0.046733 |
| PRKAR2A | 0.69019  | -0.53493 | 0.047919 |
| USO1    | 0.36936  | -1.4369  | 0.049117 |
| RPL12   | 3.0019   | 1.5859   | 0.049173 |

Table 1. Differentially expressed proteins in IPF lung tissues with FC: fold change, raw pval = raw p value.

Supplement table 2. IPA pathway analysis summary of differentially expressed proteins in IPF lung tissue

© 2000-2024 QIAGEN. All rights reserved.

| Ingenuity Canonical Pathways                                | -log(p-value) | Ratio  | z-score | Molecules                                          |  |  |
|-------------------------------------------------------------|---------------|--------|---------|----------------------------------------------------|--|--|
| Neutrophil degranulation                                    | 5.08          | 0.0189 | 1.667   | CTSB,HLA-B,MVP,PDXK,PGM1,PSMA2,S100A8,SPTAN1,SRP14 |  |  |
| Selenoamino acid metabolism                                 | 3.6           | 0.0374 | 0       | HNMT,RPL12,RPL38,RPS3A                             |  |  |
| SRP-dependent cotranslational protein targeting to membrane | 3.48          | 0.0348 | 0       | RPL12,RPL38,RPS3A,SRP14                            |  |  |
| Nonsense-Mediated Decay (NMD)                               | 3.45          | 0.0342 | 1       | PABPC1,RPL12,RPL38,RPS3A                           |  |  |
| RHOBTB3 ATPase cycle                                        | 3.45          | 0.2    | #NUM !  | CUL3,PLIN3                                         |  |  |
| Eukaryotic Translation Initiation                           | 3.38          | 0.0328 | 1       | PABPC1,RPL12,RPL38,RPS3A                           |  |  |
| Granzyme B Signaling                                        | 3.03          | 0.125  | #NUM !  | CYCS,NUMA1                                         |  |  |
